# Supplementary material for: Brief communication: Recent estimates of glacier mass loss for western North America from laser altimetry
Source: Copernicus journal article supplement (doi:10.5194/tc-18-889-2024), 2024-02-27
Supplement: Supplementary file 1 [file tc-18-889-2024-supplement.pdf]

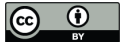

*Supplement of*

## **Brief communication: Recent estimates of glacier mass loss for western North America from laser altimetry**

**Brian Menounos et al.**

*Correspondence to:* Brian Menounos (menounos@unbc.ca)

The copyright of individual parts of the supplement might differ from the article licence.

**Table S1.** Mass budget for western North American glaciers.

| Region                         | Area [km <sup>2</sup> ] | Mass budget <sup>1</sup><br>[Gt yr <sup>-1</sup> ] |              |
|--------------------------------|-------------------------|----------------------------------------------------|--------------|
|                                |                         | [2022-2013] <sup>2</sup>                           | [2022-2018]  |
| Central Coast (1) <sup>3</sup> | 1,580                   | -2.21 ± 0.39                                       | -1.04 ± 0.74 |
| Southern Coast (2)             | 7,180                   | -7.76 ± 1.40                                       | -7.02 ± 0.54 |
| Vancouver Island (3)           | 12                      | -0.02 ± 0.01                                       | 0.00 ± 0.01  |
| Northern Interior (4)          | 253                     | -0.67 ± 0.12                                       | na           |
| Southern Interior (5)          | 1,946                   | -0.79 ± 0.11                                       | -1.14 ± 0.19 |
| Nahanni (6)                    | 649                     | -0.36 ± 0.07                                       | na           |
| Northern Rockies (7)           | 415                     | -0.32 ± 0.05                                       | na           |
| Central Rockies (8)            | 422                     | -0.26 ± 0.04                                       | -0.15 ± 0.18 |
| Southern Rockies (9)           | 1,350                   | -0.78 ± 0.10                                       | -0.98 ± 0.18 |
| Olympics (10)                  | 30                      | -0.06 ± 0.02                                       | -0.03 ± 0.02 |
| North Cascades (11)            | 250                     | -0.10 ± 0.03                                       | -0.14 ± 0.08 |
| South Cascades (12)            | 153                     | -0.07 ± 0.02                                       | -0.05 ± 0.06 |
| Sierra Nevada (13)             | 11                      | -0.01 ± 0.01                                       | na           |
| Glacier Natl. Park (14)        | 29                      | -0.01 ± 0.02                                       | -0.01 ± 0.02 |
| Wind River (15)                | 60                      | 0.00 ± 0.02                                        | -0.05 ± 0.04 |

**Notes:**

1. Mass change [kg m<sup>-2</sup> yr<sup>-1</sup>] converted to mass using a density 850 kg m<sup>-3</sup>.

2. Rates for epochs 2022-2013, 2022-2018 respectively determined using ICESat-2/COP-30 and ICESat-2/GEDI data and methods described herein and from Hugonnet et al., (2021).

3. Numbers refer to regions defined on Figure 1.
